# Supplementary material
Source: PubMed Central journal article supplement (PMC8322937)
Supplement: mmc1.pdf [file mmc1.pdf]

**The American Journal of Human Genetics, Volume 108**

**Supplemental information**

**Summix: A method for detecting and adjusting  
for population structure in genetic summary data**

**Ian S. Arriaga-MacKenzie, Gregory Matesi, Samuel Chen, Alexandria Ronco, Katie M. Marker, Jordan R. Hall, Ryan Scherenberg, Mobin Khajeh-Sharafabadi, Yinfei Wu, Christopher R. Gignoux, Megan Null, and Audrey E. Hendricks**

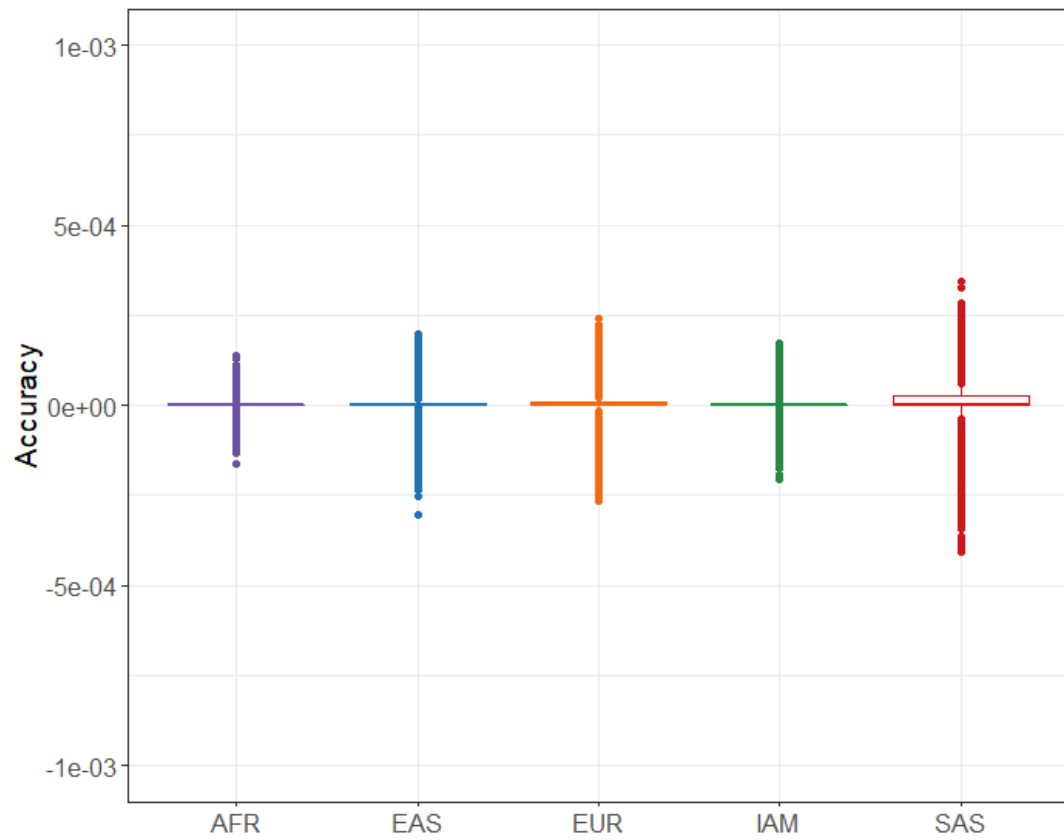

**Figure S1. Simulation results for one ancestry parameters.** Accuracy is defined as the absolute difference between the estimated ancestry proportions and given ancestry proportions within simulations. A single reference ancestry was used to simulate genotypes of a population.

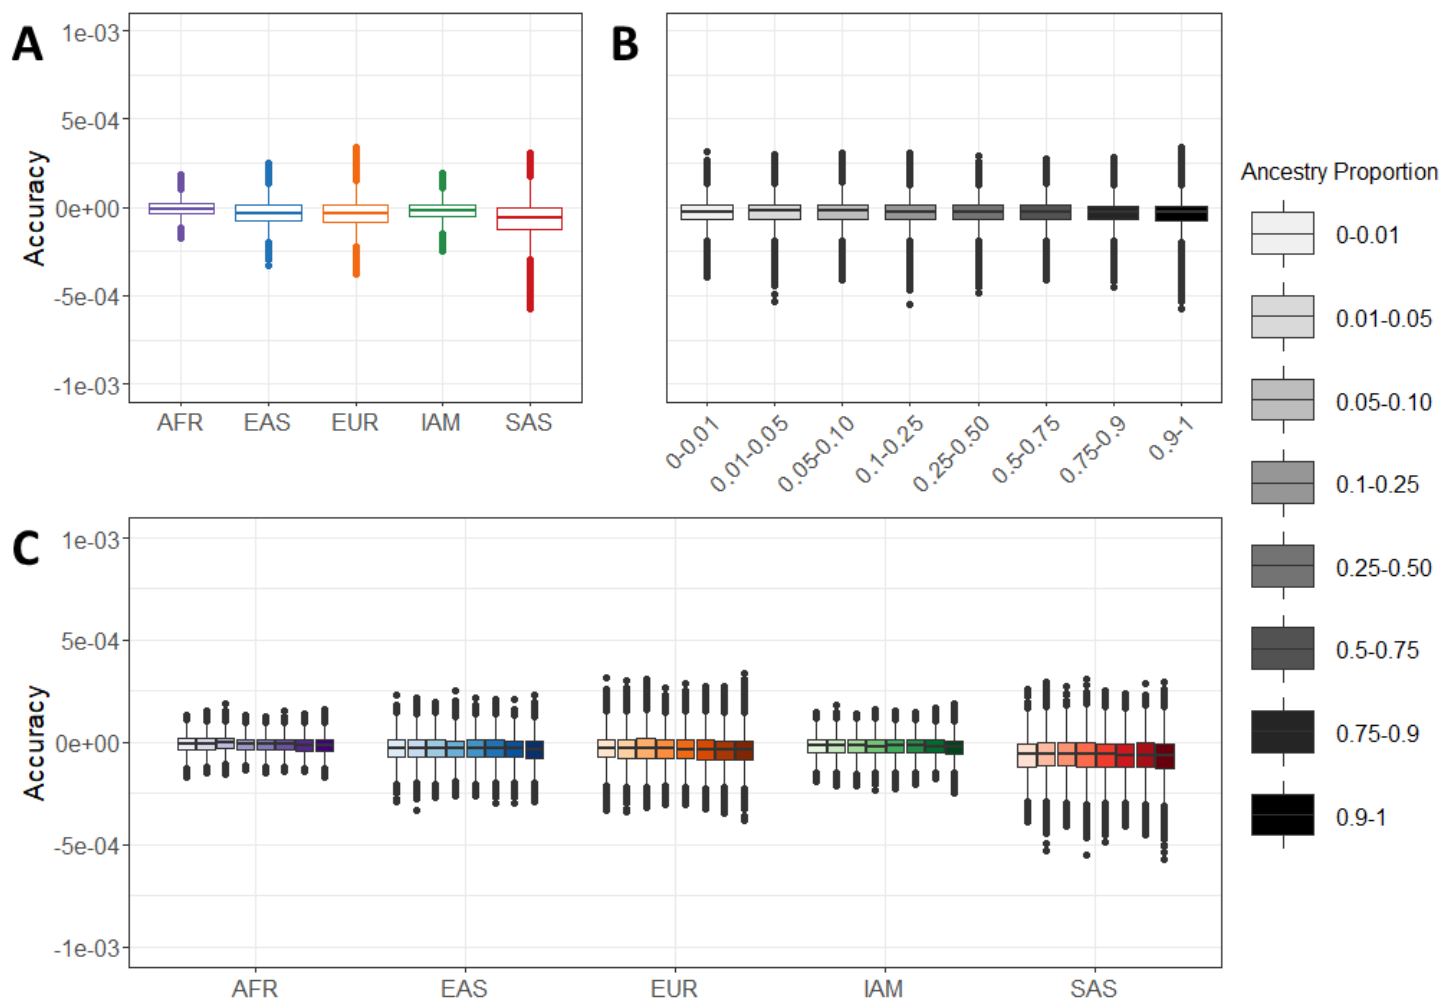

**Figure S2. Simulation results for two ancestry parameters.** Accuracy is defined as the absolute difference between the estimated ancestry proportions and given ancestry proportions within simulations. Two reference ancestries were used to simulate genotypes of an admixed population. **A)** Accuracy separated by ancestry. **B)** Accuracy separated by ancestry proportion. **C)** Accuracy separated by both ancestry and ancestry proportion.

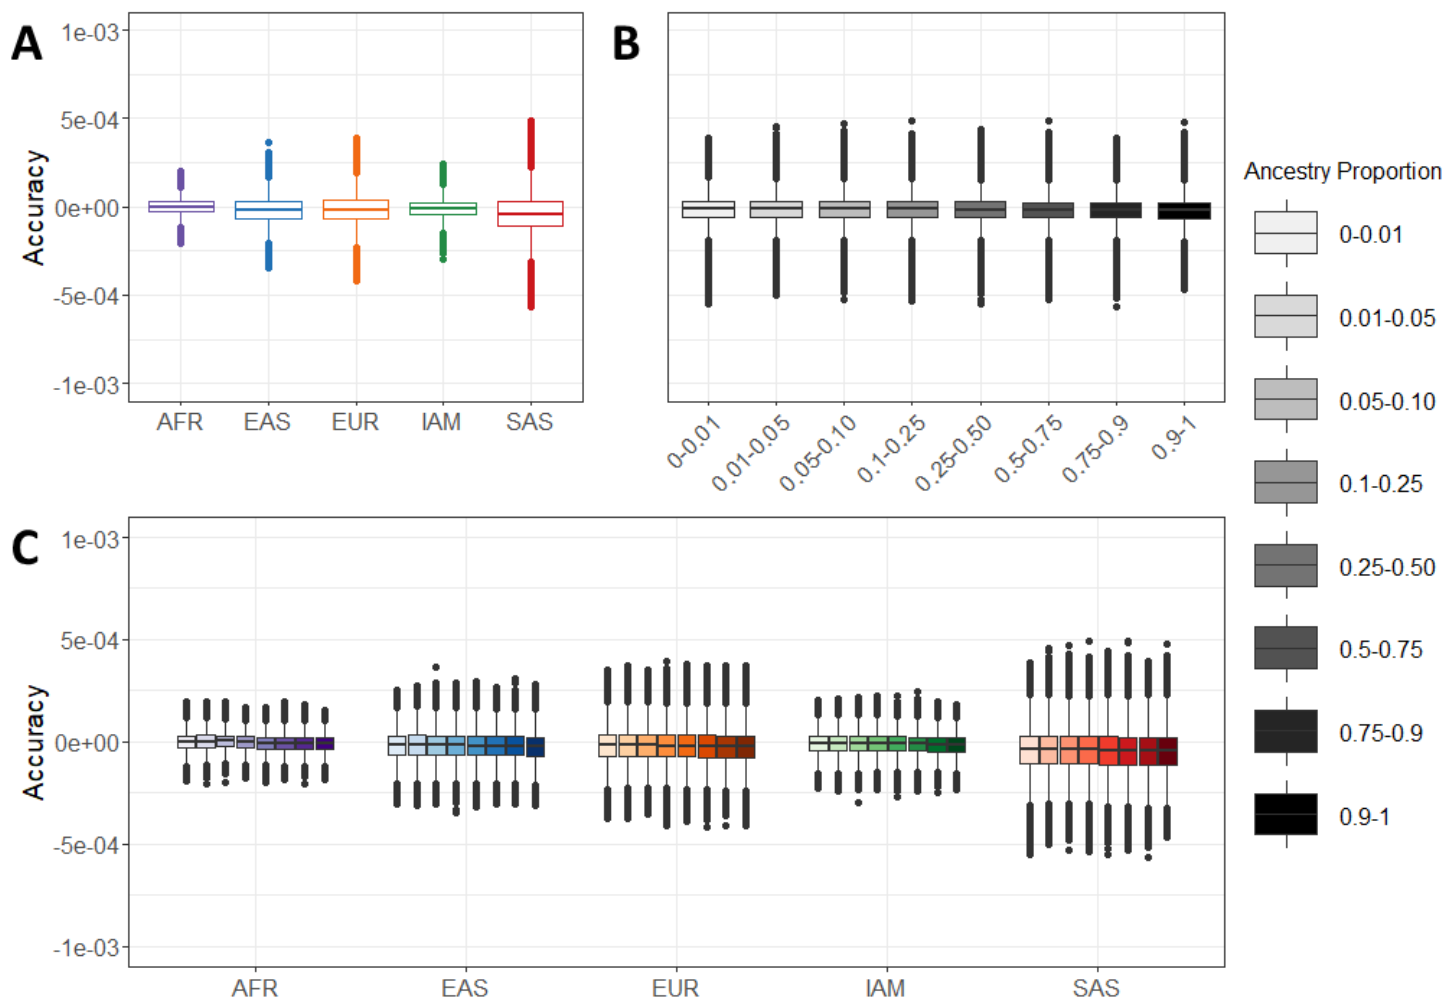

**Figure S3. Simulation results for three ancestry parameters.** Accuracy is defined as the absolute difference between the estimated ancestry proportions and given ancestry proportions within simulations. Three reference ancestries were used to simulate genotypes of an admixed population. **A)** Accuracy separated by ancestry. **B)** Accuracy separated by ancestry proportion. **C)** Accuracy separated by both ancestry and ancestry proportion.

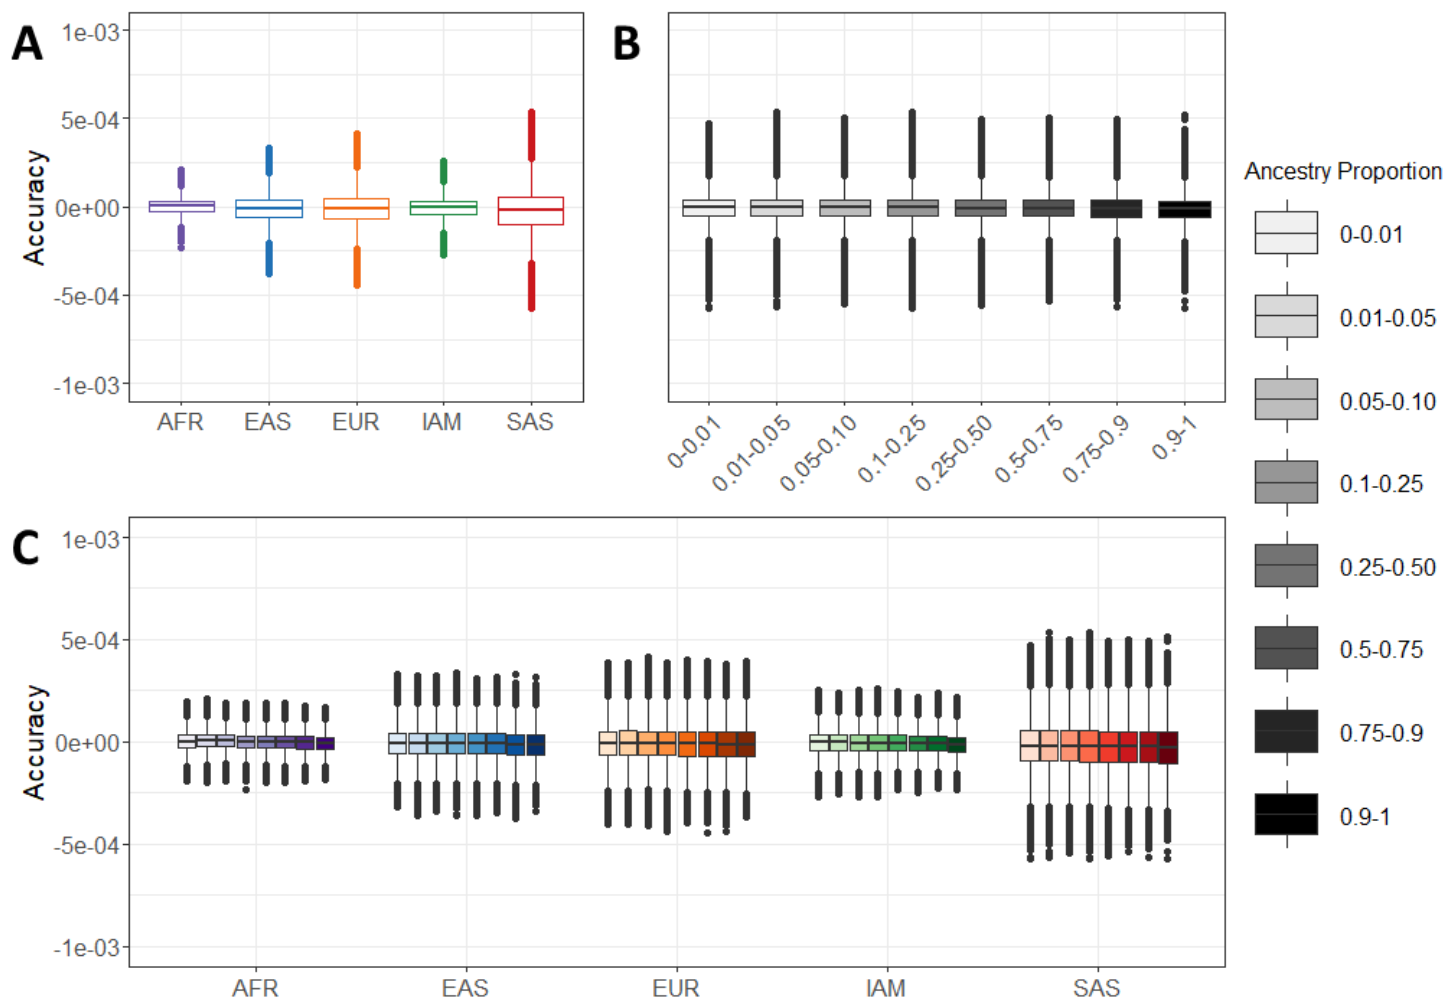

**Figure S4. Simulation results for four ancestry parameters.** Accuracy is defined as the absolute difference between the estimated ancestry proportions and given ancestry proportions within simulations. Four reference ancestries were used to simulate genotypes of an admixed population. **A)** Accuracy separated by ancestry. **B)** Accuracy separated by ancestry proportion. **C)** Accuracy separated by both ancestry and ancestry proportion.

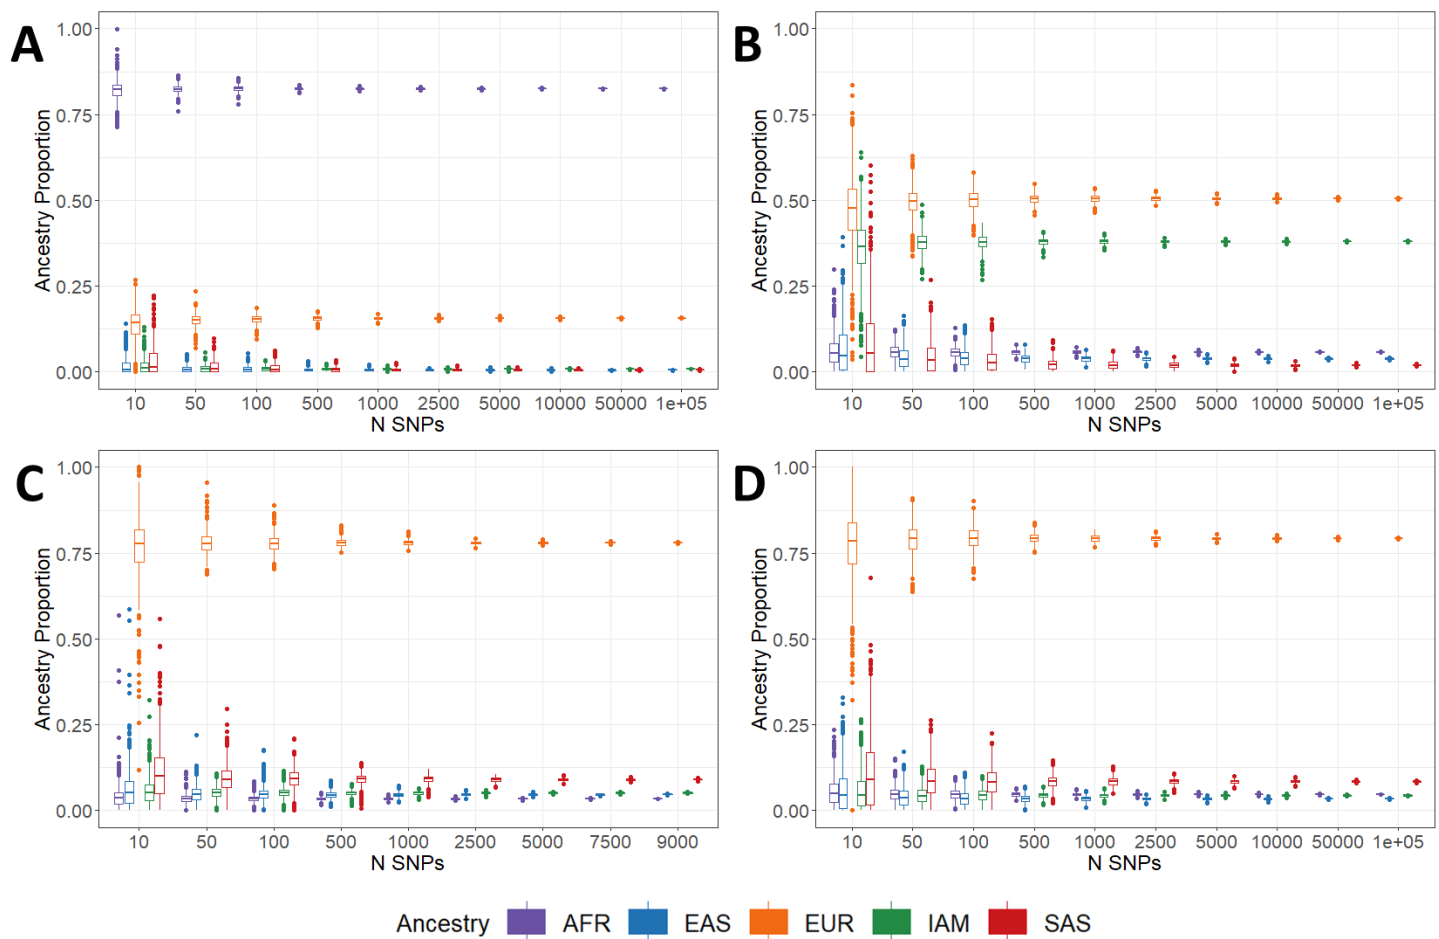

**Figure S5. Precision in ancestry estimates for AFR, AMR and OTH gnomad groups by number of SNPs.** Number of SNPs (x-axis), estimated ancestry proportion (y-axis) for 1,000 replicates; **A)** AFR genome. **B)** AMR genome. **C)** OTH exome. **D)** OTH genome.

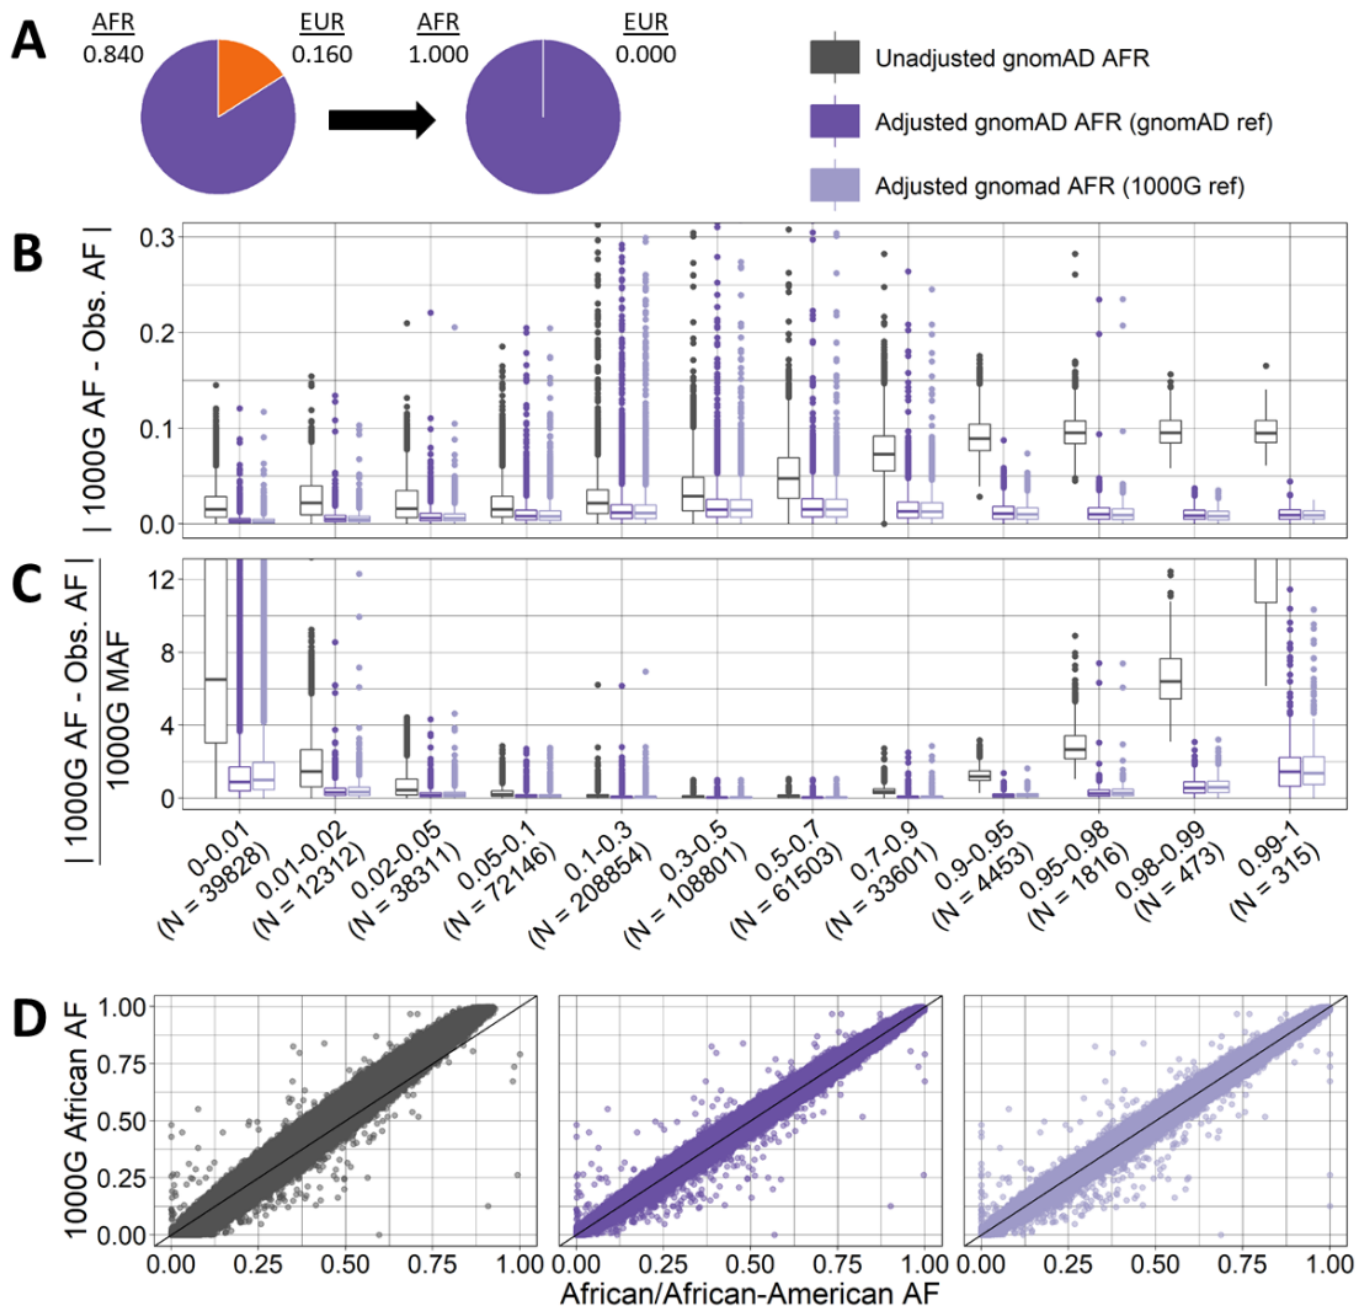

**Figure S6. Ancestry-adjusted vs. unadjusted allele frequency for gnomAD African/African American genomes for a target sample with African ancestry.** Ancestry-adjusted AF was estimated for a target sample with 100% African ancestry using gnomAD (dark purple) or 1000 Genomes (light purple) Non-Finnish European as reference and compared to unadjusted AF (grey) for 582,413 SNPs. **A)** ancestry proportions for gnomAD African/African American genomes (AFR = 0.840, EUR=0.160) and target sample (AFR = 1); **B)** absolute difference between target sample AF (1000 Genomes African ancestry) and unadjusted or ancestry-adjusted gnomAD AF by 1000 Genomes AF category; **C)** relative difference between target 1000 Genomes African ancestry AF and unadjusted or ancestry-adjusted gnomAD AF by 1000 Genomes AF category; unzoomed figures B and C are available in the supplemental (**Figure S7**). **D)** scatter plot of target sample 1000 Genomes AF (y-axis) and unadjusted (left), ancestry-adjusted with gnomAD reference (center), and ancestry-adjusted with 1000 Genomes reference (right) gnomAD AF (x-axis).

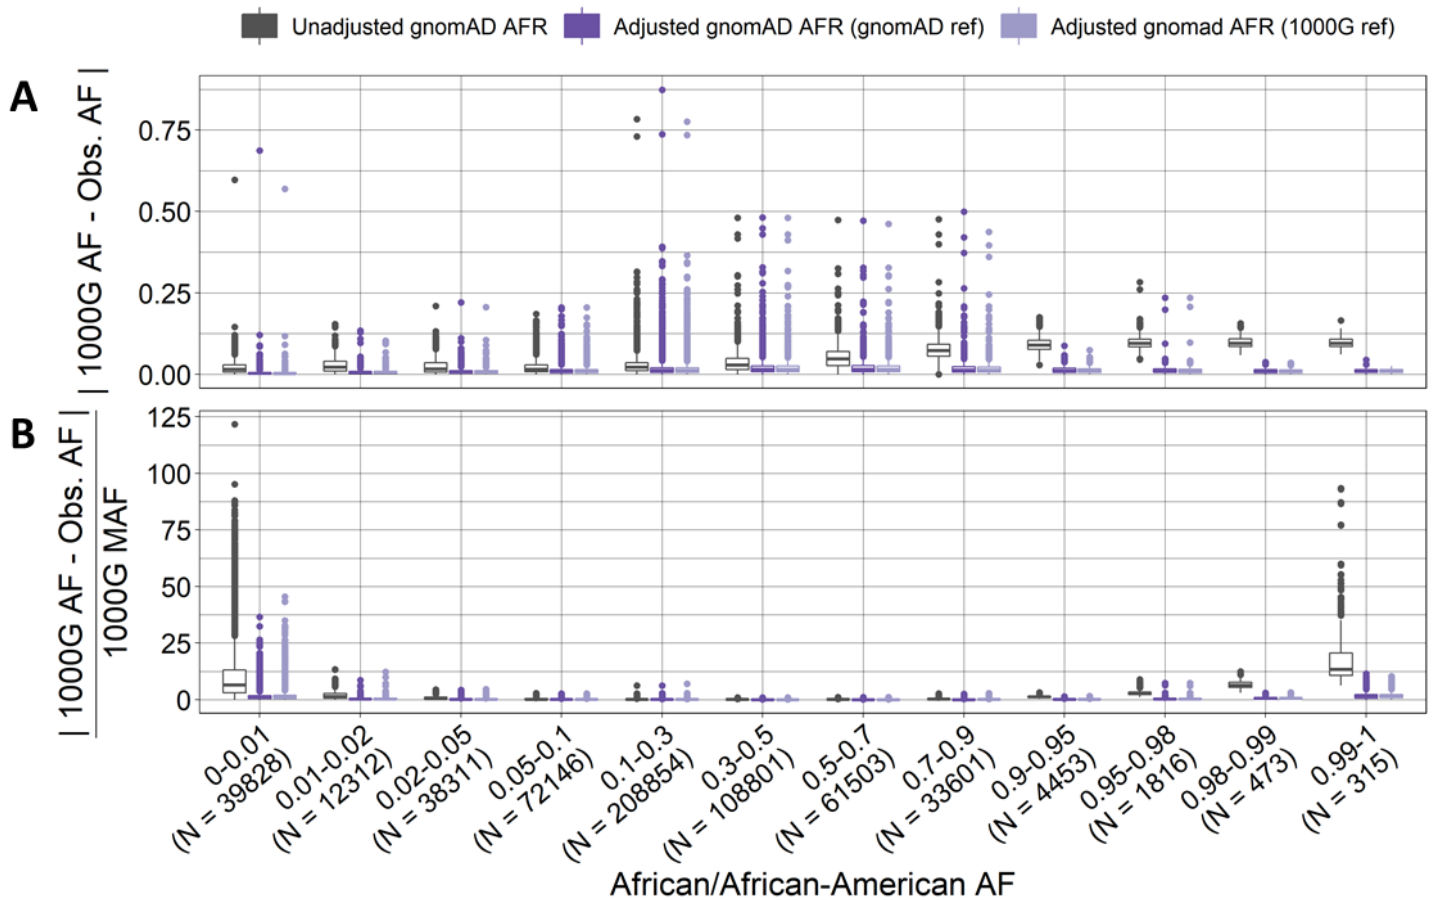

**Figure S7. Unzoomed Ancestry-adjusted vs. unadjusted allele frequency for gnomAD African/African American genomes for a target sample with African ancestry (Complimentary to Figure S6). A)** absolute difference between target sample AF (1000 Genomes African ancestry) and unadjusted or ancestry-adjusted gnomAD AF by 1000 Genomes AF category; **B)** relative difference between target 1000 Genomes African ancestry AF and unadjusted or ancestry-adjusted gnomAD AF by 1000 Genomes AF category.



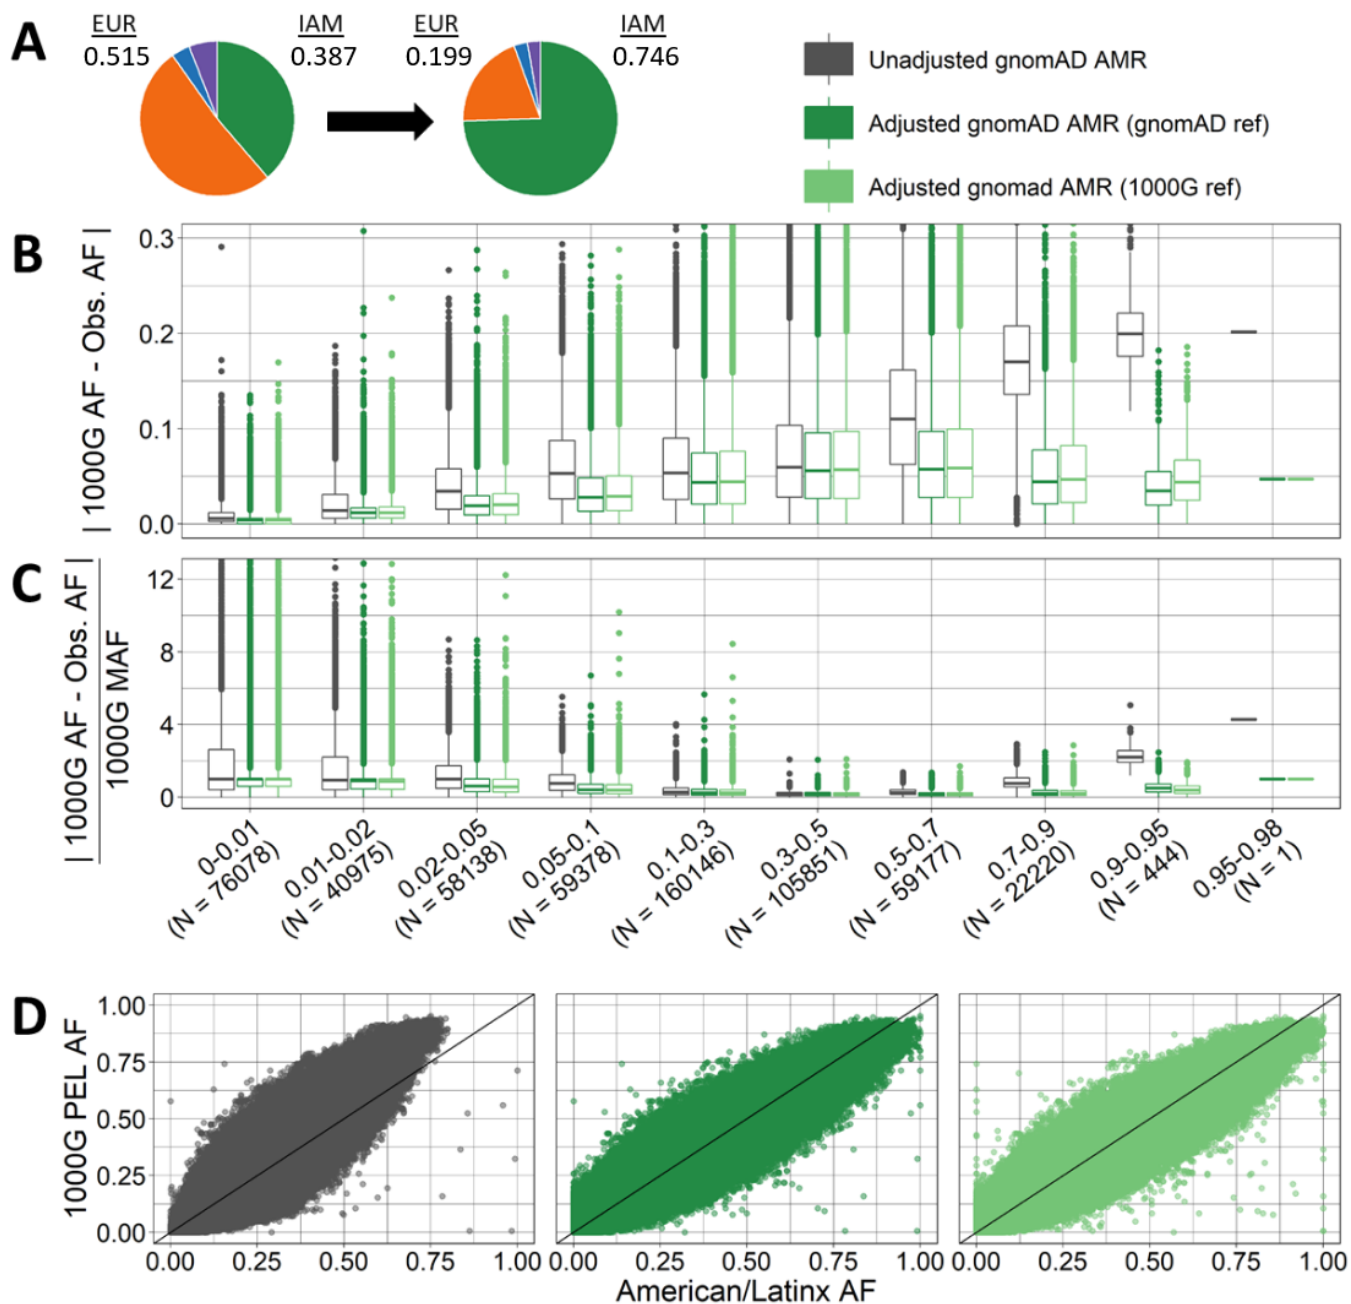

**Figure S8. Ancestry-adjusted vs. unadjusted allele frequency for gnomAD**

**American/Latinx genomes for a target sample of Peruvian ancestry.** Ancestry-adjusted AF was estimated for a target Peruvian sample using gnomAD (dark green) or 1000 Genomes (light green) East Asian, European, and African as reference ancestral populations and compared to unadjusted AF (grey) for 582,408 SNPs. **A)** normalized ancestry proportions estimated for gnomAD American/Latinx genomes (purple AFR = 0.059, blue EAS=0.039, orange EUR=0.515, green IAM=0.387) and target Peruvian ancestry proportions (purple AFR = 0.028, blue EAS=0.027, orange EUR=0.199, green IAM=0.746); **B)** absolute difference between target 1000 Genomes Peruvian ancestry AF and unadjusted or ancestry-adjusted gnomAD AF by 1000 Genomes AF category; **C)** relative difference between target 1000 Genomes Peruvian ancestry AF and unadjusted or ancestry-adjusted gnomAD AF by 1000 Genomes AF category; unzoomed figures B and C are available in the supplemental (**Figure S9**). **D)** scatter plot of target 1000 Genomes AF (y-axis) and unadjusted (left), ancestry-adjusted with gnomAD reference (center), and ancestry-adjusted with 1000 Genomes reference (right) gnomAD AF (x-axis).

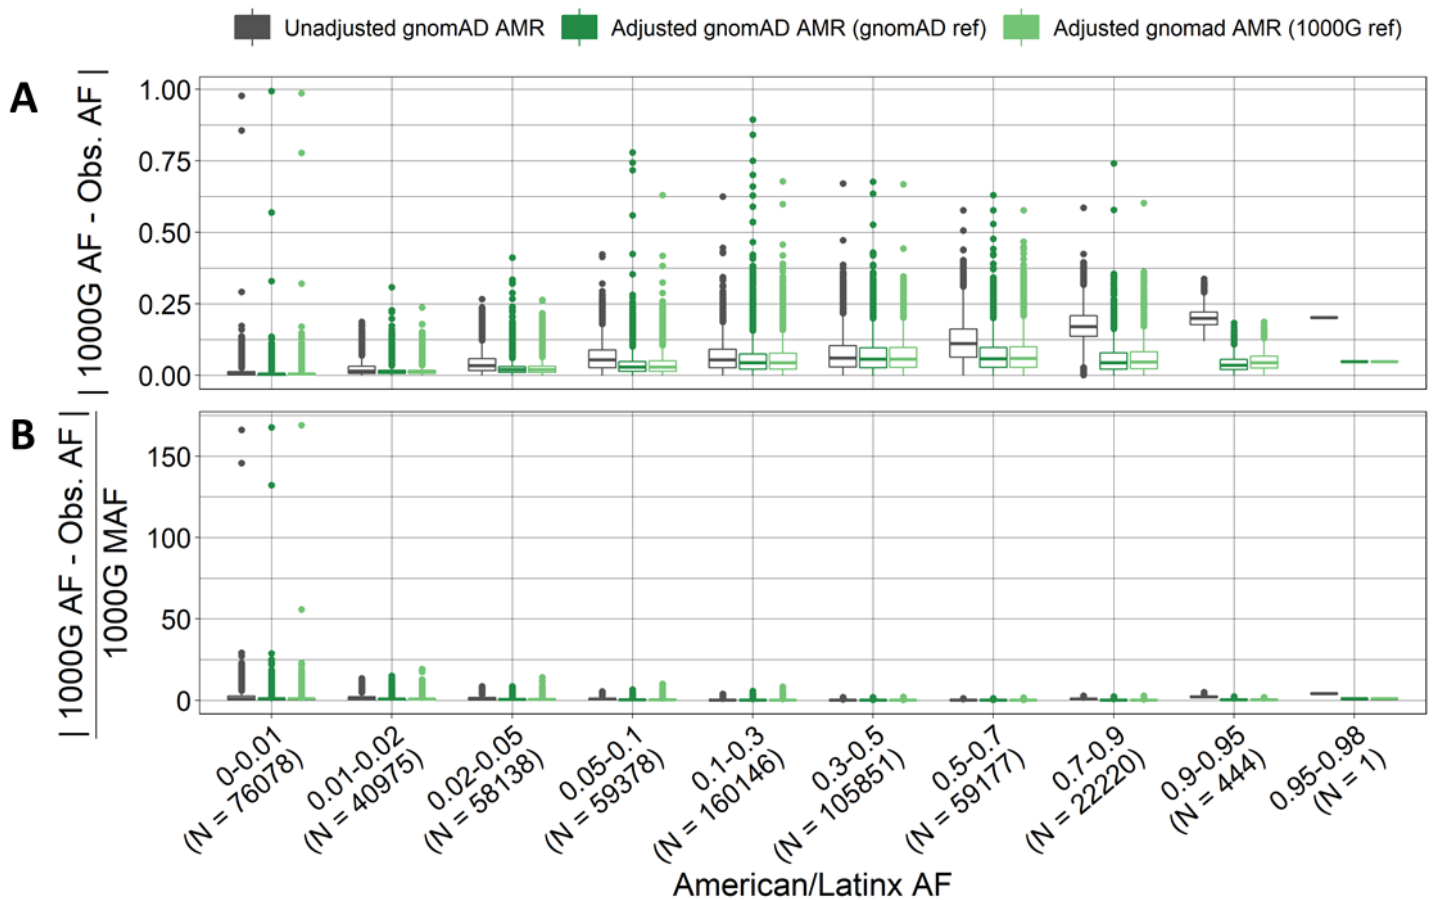

**Figure S9. Unzoomed Ancestry-adjusted vs. unadjusted allele frequency for gnomAD American/Latinx genomes for a target sample of Peruvian ancestry (Complimentary to Figure S8). A) absolute difference between target 1000 Genomes Peruvian ancestry AF and unadjusted or ancestry-adjusted gnomAD AF by 1000 Genomes AF category; B) relative difference between target 1000 Genomes Peruvian ancestry AF and unadjusted or ancestry-adjusted gnomAD AF by 1000 Genomes AF category.**

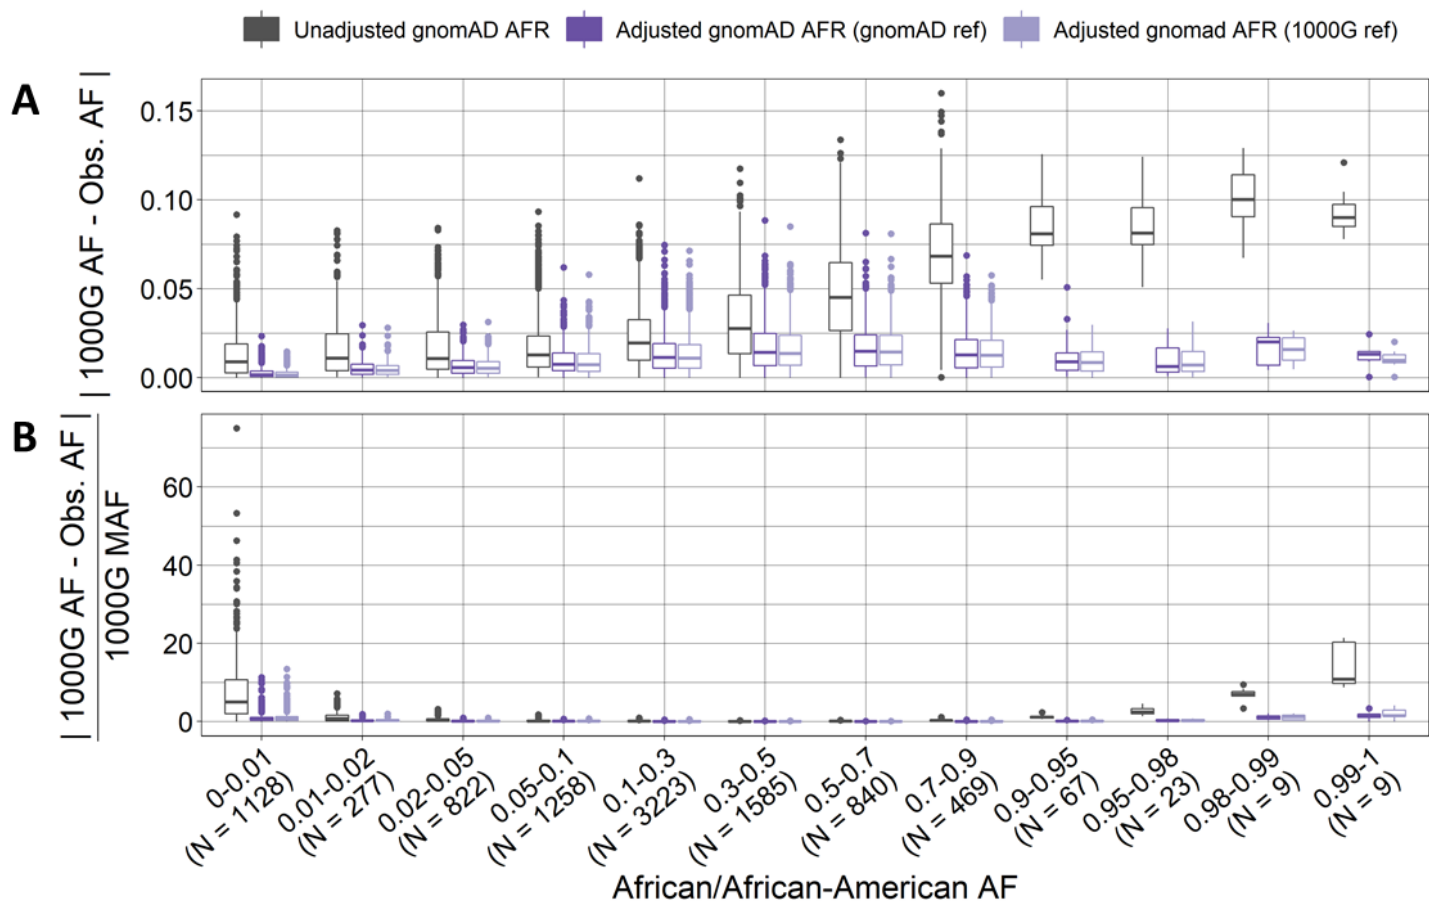

**Figure S10. Unzoomed Ancestry-adjusted vs. unadjusted allele frequency for gnomAD African/African American exomes for a target sample with African ancestry (Complimentary to Figure 3). A)** absolute difference between target sample AF (1000 Genomes African ancestry) and unadjusted or ancestry-adjusted gnomAD AF by 1000 Genomes AF category; **B)** relative difference between target 1000 Genomes African ancestry AF and unadjusted or ancestry-adjusted gnomAD AF by 1000 Genomes AF category.

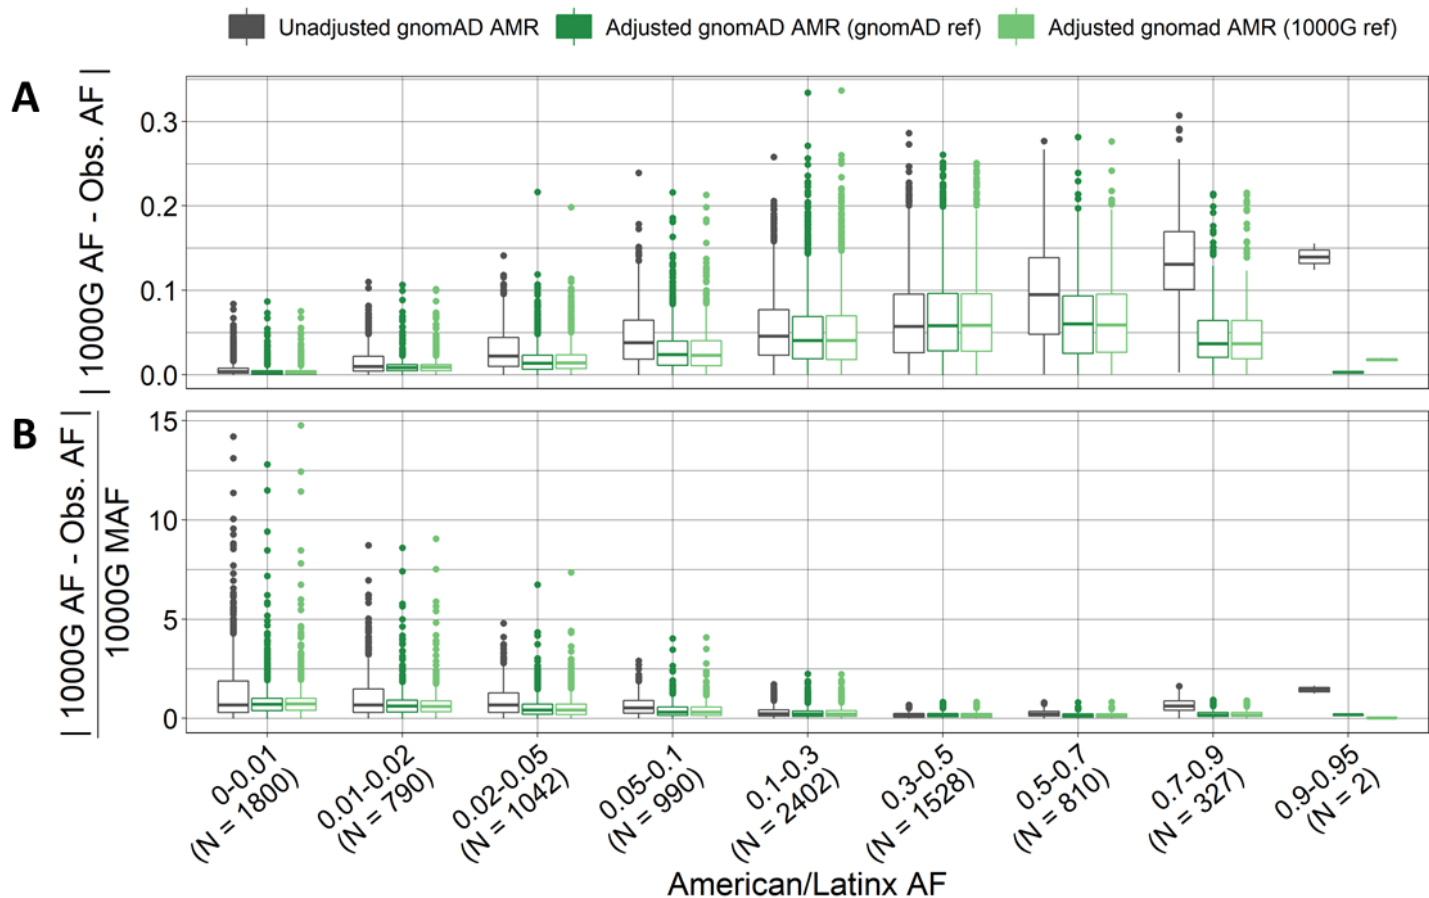

**Figure S11. Unzoomed Ancestry-adjusted vs. unadjusted allele frequency for gnomAD American/Latinx exomes for a target sample of Peruvian ancestry (Complimentary to Figure 4).** **A)** absolute difference between target 1000 Genomes Peruvian ancestry AF and unadjusted or ancestry-adjusted gnomAD AF by 1000 Genomes AF category; **B)** relative difference between target 1000 Genomes Peruvian ancestry AF and unadjusted or ancestry-adjusted gnomAD AF by 1000 Genomes AF category.

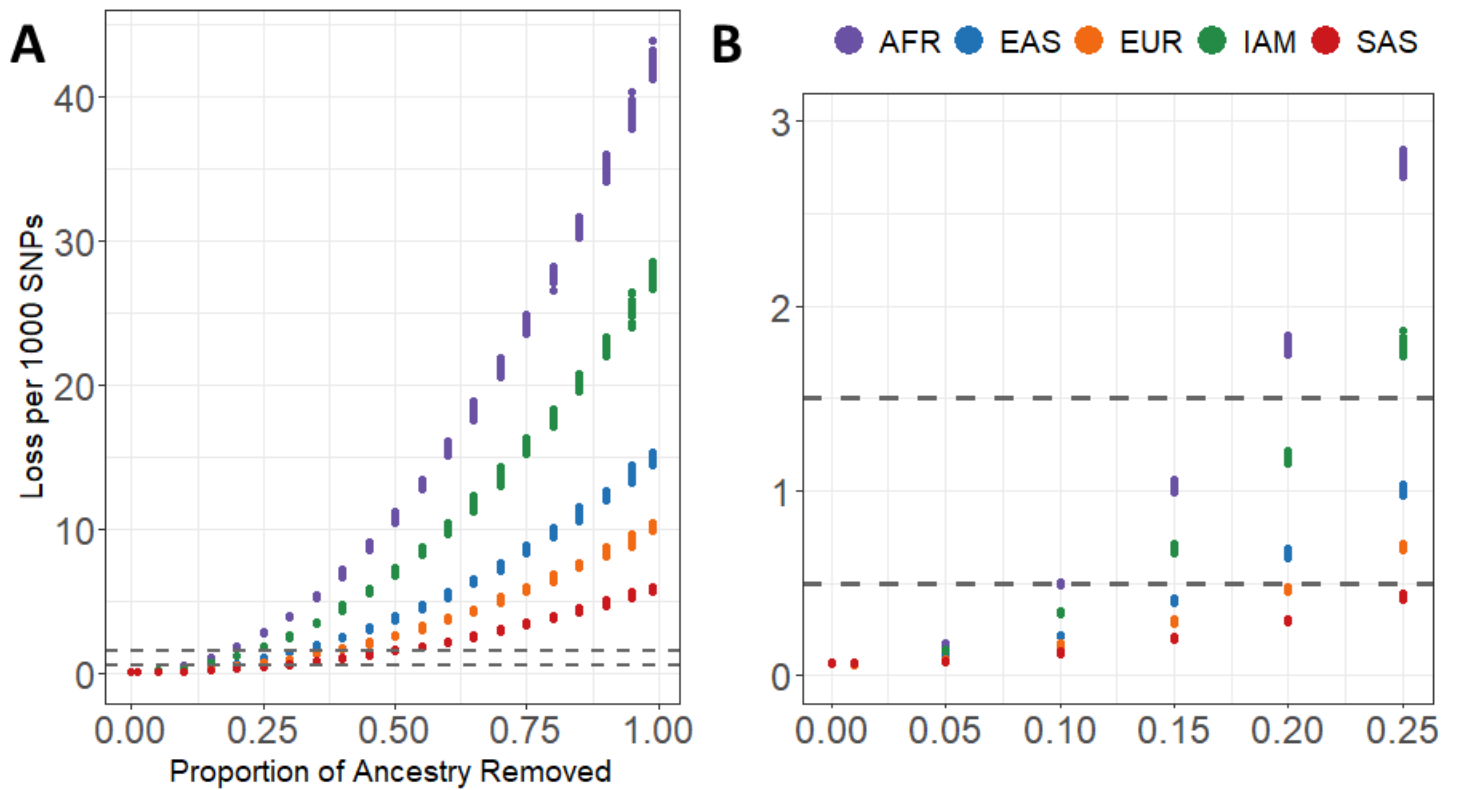

**Figure S12. Reference panel sensitivity results for simulated admixed populations.** 5-way admixed populations were simulated with a target ancestry held in constant proportion, and other 4 ancestries allowed to be random with constraint that all 5 sum to one. Target ancestry was removed from reference panel, which was used for ancestry estimation and least squares loss. **A)** Least-squares loss per 1000 SNPs for all simulation parameters. **B)** Zoomed plot showing proportion of ancestry removed between 0 and 0.25.

**Table S12.** Number of variants and proportion rounded to 0 and 1 after adjusting the allele frequency for ancestry.

|                            |                     | <b>Target Sample</b>                             |                   |
|----------------------------|---------------------|--------------------------------------------------|-------------------|
|                            |                     | <b>Number of SNPs<br/>(Proportion Corrected)</b> |                   |
| <b>Reference data used</b> |                     | <b>African</b>                                   | <b>Peruvian</b>   |
| <b>Exome</b>               | <b>gnomAD</b>       | 152<br>(0.015)                                   | 427<br>(0.049)    |
|                            | <b>1000 Genomes</b> | 184<br>(0.018)                                   | 473<br>(0.055)    |
| <b>Genome</b>              | <b>gnomAD</b>       | 4,937<br>(0.008)                                 | 49,115<br>(0.084) |
|                            | <b>1000 Genomes</b> | 5,448<br>(0.009)                                 | 50,542<br>(0.087) |

**Table S13.** Ancestry proportion estimates for 1000 Genomes Peruvian sample using Summix and ADMIXTURE (95% CI)

| Ancestry                    | Summix | ADMIXTURE               |                         |                                             |
|-----------------------------|--------|-------------------------|-------------------------|---------------------------------------------|
|                             |        | Supervised Estimates    | Unsupervised Estimates  | Projected Estimates from Unsupervised AF    |
| <b>Indigenous American</b>  | 0.723  | 0.768<br>(0.736, 0.799) | 0.763<br>(0.732, 0.795) | 0.724                                       |
| <b>Non-Finnish European</b> | 0.209  | 0.196<br>(0.166, 0.226) | 0.199<br>(0.169, 0.229) | 0.209                                       |
| <b>African</b>              | 0.033  | 0.027<br>(0.018, 0.035) | 0.027<br>(0.018, 0.035) | 0.033                                       |
| <b>East Asian</b>           | 0.035  | 0.010<br>(0.003, 0.017) | 0.011<br>(0.003, 0.020) | 0.033                                       |
| <b>Run Time*</b>            | 3s     | 24m 55s                 | 147m 58s                | Unsupervised: 97m 51s<br>Projection: 1m 51s |

\*Dual Intel Xeon E5-2670v2 2.5Ghz (10 core/20 thread) with 192GB DDR3-1600 ECC Registered Memory

**Table S14.** Unadjusted and adjusted values for *PADI3* variants from Malki et al. 2019.

| rsID<br>Location<br>DNA Sequence<br>Variant<br>AA Sequence Change | AN    | unadjusted |      |                          | 100% AFR adjusted |      |                                |
|-------------------------------------------------------------------|-------|------------|------|--------------------------|-------------------|------|--------------------------------|
|                                                                   |       | AF         | AC   | Number of<br>Homozygotes | AF                | AC*  | Number of<br>Homozygotes*<br>* |
| rs139426141<br>1-17597398-A-G<br>c.856A→G<br>p.Thr286Ala          | 24952 | 0.0365     | 910  | 23                       | 0.0434            | 1082 | 47                             |
| rs34097903<br>1-17607274-G-A<br>c.1744G→A<br>p.Ala582Thr          | 24964 | 0.0227     | 566  | 6                        | 0.0270            | 673  | 18                             |
| rs140482516<br>1-17607199-C-T<br>c.1669C→T<br>p.Arg557Trp         | 24968 | 0.0075     | 188  | 0                        | 0.0089            | 223  | 2                              |
| rs1557508308<br>1-17597372-A-G<br>c.832-2A→G<br>splicing          | 0     | 0          | 0    | 0                        | 0                 | 0    | 0                              |
| rs1437225536<br>1-17609534-G-A<br>c.1955G→A<br>p.Arg652Lys        | 8716  | 0.0001     | 1    | 0                        | 0.0001            | 1    | 0                              |
| rs139876092<br>1-17594433-C-T<br>c.628C→T<br>p.Arg210Trp          | 24962 | 0.00164    | 41   | 0                        | 0.0019            | 48   | 0                              |
| Total                                                             | --    | --         | 1706 | 29                       | --                | 2027 | 67                             |

\*  $AC_{adj} = \text{round}(AF_{adj} * AN)$

\*\*Adjusted number of homozygotes was estimated assuming Hardy-Weinberg equilibrium,  $N_{homozygotes} = \text{round}(AF_{adj}^2 * AN)$



**Table S15.** Number of cases and African/African American gnomAD v2.1 controls with minor alleles in *PADI3* variants reported from Malki et al.

|                                    | Cases | gnomAD v2.1 African |                      |
|------------------------------------|-------|---------------------|----------------------|
|                                    |       | unadjusted          | 100% AFR adjusted*** |
| <b>Minor allele</b>                | 14    | 1677*               | 1960                 |
| <b>No minor allele</b>             | 44    | 10810**             | 10527                |
| <b>Chi Square p-value</b>          |       | 0.029               | 0.114                |
| <b>Fisher's exact test p-value</b> |       | 0.031               | 0.101                |

\* number of individuals with at least one minor allele was estimated by removing the number of homozygotes from the total minor allele count

\*\* number of individuals with no minor allele was estimated as the total number of gnomAD v2.1 African/African American individuals (N=12,487) minus the number of estimates individuals with at least one minor allele

\*\*\* adjusted number of individuals was estimated by  $\sum_{j=1}^K \text{round} \left( AN_j * AF_{adj_j} - AN_j * AF_{adj_j}^2 \right)$  where  $AN_j$  and  $AF_{adj_j}$  are the observed allele number and adjusted allele frequency for variant j respectively. The values are rounded to the nearest integer before summing.

**Table S16.** Unadjusted and adjusted allele frequency for F508del in *CFTR*

| <b>gnomAD v2.1 group</b>  | <b>AC</b> | <b>AN</b> | <b>Number of Homozygotes</b> | <b>Unadjusted AF</b> | <b>Adjusted AF*</b> |
|---------------------------|-----------|-----------|------------------------------|----------------------|---------------------|
| <b>Exomes</b>             |           |           |                              |                      |                     |
| Non-Finnish European      | 1394      | 113626    | 1                            | 0.0123               | NA                  |
| African/ African American | 48        | 16248     | 0                            | 0.0030               | 0.0014              |
| <b>Genomes</b>            |           |           |                              |                      |                     |
| Non-Finnish European      | 204       | 15408     | 0                            | 0.0132               | NA                  |
| African/ African American | 17        | 8710      | 0                            | 0.0020               | 0**                 |

\* Adjusted AF for 100% African using gnomAD Non-Finish European AF and assuming only European admixture

\*\* We recommend caution when interpreting adjusted AF at or close to 0.

**TABLE S19.** Least-squares loss per 1000 SNPs across exome and genome gnomAD groups.

| Ancestry                        | Exome |            |           | Genome |            |           |
|---------------------------------|-------|------------|-----------|--------|------------|-----------|
|                                 | SNPs  | Iterations | Loss/1000 | SNPs   | Iterations | Loss/1000 |
| <b>African/African-American</b> | 9750  | 24         | 0.234     | 582156 | 32         | 0.221     |
| <b>American/Latinx</b>          | 9722  | 38         | 1.080     | 582155 | 45         | 0.824     |
| <b>Other</b>                    | 9749  | 25         | 0.451     | 582156 | 42         | 0.680     |
| <b>Non-Finnish European</b>     | 9763  | 29         | 0.374     | 582156 | 24         | 0.500     |
| <b>East Asian</b>               | 9732  | 30         | 0.346     | 582155 | 20         | 0.433     |
| <b>South Asian</b>              | 9719  | 44         | 0.337     | --     | --         | --        |
| <b>Finnish</b>                  | 9728  | 49         | 2.617     | 582155 | 85         | 2.618     |
| <b>Ashkenazi Jewish</b>         | 9749  | 121        | 2.047     | 582156 | 68         | 2.462     |
